# Supplementary material
Source: Springer Nature journal article supplement (https://www.springermedizin.de/resource/supplementary/12887_2013_971_MOESM3_ESM.pdf/9476812)
Supplement: MOESM3 [file 9476812]

Versão final do questionário CPCHILD® traduzido e adaptado para a língua portuguesa no Brasil  
**Prioridades do Cuidador e Índice de Saúde da Criança com Deficiências**

**Instruções**

1. Este questionário é sobre a saúde, conforto e bem-estar do seu filho(a), e o cuidado no atendimento de suas necessidades.
2. Leia as instruções com atenção.
3. Responda todas as perguntas fazendo um círculo em volta do número que corresponde à melhor resposta. Você pode acrescentar comentários ou esclarecimentos no espaço deixado em baixo de cada pergunta.

**NÍVEL DE AJUDA**

|                                                                                                                                                                                                                                                                                           |  |                   |                      |                |                         |              |                    |                            |                       |                       |                                                                                                                    |                            |
|-------------------------------------------------------------------------------------------------------------------------------------------------------------------------------------------------------------------------------------------------------------------------------------------|--|-------------------|----------------------|----------------|-------------------------|--------------|--------------------|----------------------------|-----------------------|-----------------------|--------------------------------------------------------------------------------------------------------------------|----------------------------|
| <b>Por exemplo:</b>                                                                                                                                                                                                                                                                       |  |                   |                      |                |                         |              |                    |                            | T<br>O<br>T<br>A<br>L | M<br>É<br>D<br>I<br>O | M<br>Í<br>N<br>I<br>M<br>O<br><br>O<br>U<br><br>S<br>U<br>P<br>E<br>R<br>V<br>I<br>S<br>I<br>O<br>N<br>A<br>D<br>O | N<br>E<br>N<br>H<br>U<br>M |
| Considere como cada uma das atividades a seguir é <b>geralmente</b> realizada por/para seu filho(a). Avalie o <b>grau de dificuldade</b> de cada uma dessas atividades nas últimas 2 semanas e indique o <b>nível de ajuda</b> que foi necessária para ajudar seu filho(a) a realizá-las. |  |                   |                      |                |                         |              |                    |                            |                       |                       |                                                                                                                    |                            |
| <b>Nas últimas duas semanas, qual foi o grau de dificuldade nas seguintes situações?</b>                                                                                                                                                                                                  |  | <i>Impossível</i> | <i>Muito Difícil</i> | <i>Difícil</i> | <i>Um Pouco Difícil</i> | <i>Fácil</i> | <i>Muito Fácil</i> | <i>Sem Nenhum Problema</i> |                       |                       |                                                                                                                    |                            |
| <b>1. Colocar meias, sapatos, aparelho ortopédico, etc.?</b>                                                                                                                                                                                                                              |  | <b>0</b>          | <b>1</b>             | <b>2</b>       | <b>3</b>                | <b>4</b>     | <b>5</b>           | <b>6</b>                   | <b>0</b>              | <b>1</b>              | <b>2</b>                                                                                                           | <b>3</b>                   |

No exemplo acima, a tarefa de colocar meias, sapatos, aparelhos ortopédicos, etc. foi considerada *muito fácil*, e a criança exigiu um nível de auxílio *mínimo ou supervisionado* para realizá-la.

4. Ao final de cada seção, há um espaço para você adicionar quaisquer outros itens, que na sua opinião, estejam faltando no questionário e que você julgue importante para a saúde, conforto e bem-estar de seu filho(a).

Nome da criança:.....

Nome do pai/mãe ou cuidador(a) que preencheu este questionário:.....

Data:...../...../.....

## SEÇÃO 1: CUIDADOS PESSOAIS / ATIVIDADES DA VIDA DIÁRIA

NÍVEL DE AJUDA

| Considere como cada uma das atividades a seguir é <b>geralmente</b> realizada por/para seu filho(a). Avalie o <b>grau de dificuldade</b> de cada uma dessas atividades nas últimas 2 semanas e indique o <b>nível de ajuda</b> que foi necessária para ajudar seu filho(a) a realizá-las. |                   |                      |                |                         |              |                    |                            | T<br>O<br>T<br>A<br>L | M<br>É<br>D<br>I<br>O | M<br>Í<br>N<br>I<br>M<br>O<br><br>O<br>U<br><br>S<br>U<br>P<br>E<br>R<br>V<br>I<br>S<br>I<br>O<br>N<br>A<br>D<br>O | N<br>E<br>N<br>H<br>U<br>M |
|-------------------------------------------------------------------------------------------------------------------------------------------------------------------------------------------------------------------------------------------------------------------------------------------|-------------------|----------------------|----------------|-------------------------|--------------|--------------------|----------------------------|-----------------------|-----------------------|--------------------------------------------------------------------------------------------------------------------|----------------------------|
| Nas últimas <b>duas</b> semanas, qual foi o grau de dificuldade nas seguintes situações:                                                                                                                                                                                                  | <i>Impossível</i> | <i>Muito Difícil</i> | <i>Difícil</i> | <i>Um Pouco Difícil</i> | <i>Fácil</i> | <i>Muito Fácil</i> | <i>Sem Nenhum Problema</i> |                       |                       |                                                                                                                    |                            |
| <b>1. Alimentar seu filho(a)? (da maneira usual, por exemplo, oralmente, por sonda ou ambos).</b>                                                                                                                                                                                         | 0                 | 1                    | 2              | 3                       | 4            | 5                  | 6                          | 0                     | 1                     | 2                                                                                                                  | 3                          |
| <b>2. Manter a higiene bucal? (manutenção da boca e dos dentes limpos).</b>                                                                                                                                                                                                               | 0                 | 1                    | 2              | 3                       | 4            | 5                  | 6                          | 0                     | 1                     | 2                                                                                                                  | 3                          |
| <b>3. Dar banho em seu filho(a)?</b>                                                                                                                                                                                                                                                      | 0                 | 1                    | 2              | 3                       | 4            | 5                  | 6                          | 0                     | 1                     | 2                                                                                                                  | 3                          |
| <b>4. Utilizar o banheiro? (urinar, defecar e limpar-se).</b>                                                                                                                                                                                                                             | 0                 | 1                    | 2              | 3                       | 4            | 5                  | 6                          | 0                     | 1                     | 2                                                                                                                  | 3                          |
| <b>5. Trocar fraldas (roupas de baixo)?</b>                                                                                                                                                                                                                                               | 0                 | 1                    | 2              | 3                       | 4            | 5                  | 6                          | 0                     | 1                     | 2                                                                                                                  | 3                          |
| <b>6. Vestir ou tirar roupas da parte de cima do corpo? (camisa, casaco, etc.).</b>                                                                                                                                                                                                       | 0                 | 1                    | 2              | 3                       | 4            | 5                  | 6                          | 0                     | 1                     | 2                                                                                                                  | 3                          |
| <b>7. Vestir ou tirar roupas da parte de baixo do corpo? (calças, abrigo, etc.).</b>                                                                                                                                                                                                      | 0                 | 1                    | 2              | 3                       | 4            | 5                  | 6                          | 0                     | 1                     | 2                                                                                                                  | 3                          |
| <b>8. Colocar meias, sapatos, aparelho ortopédico, etc.?</b>                                                                                                                                                                                                                              | 0                 | 1                    | 2              | 3                       | 4            | 5                  | 6                          | 0                     | 1                     | 2                                                                                                                  | 3                          |

|                                                                         |   |   |   |   |   |   |   |   |   |   |   |
|-------------------------------------------------------------------------|---|---|---|---|---|---|---|---|---|---|---|
| 9. Cuidar dos cabelos? (lavar, secar, escovar, pentear, trançar, etc.). | 0 | 1 | 2 | 3 | 4 | 5 | 6 | 0 | 1 | 2 | 3 |
| 1A. Outros cuidados pessoais?<br>Especifique:                           | 0 | 1 | 2 | 3 | 4 | 5 | 6 | 0 | 1 | 2 | 3 |
| 1B. Outros cuidados pessoais?<br>Especifique:                           | 0 | 1 | 2 | 3 | 4 | 5 | 6 | 0 | 1 | 2 | 3 |

## SEÇÃO 2: POSICIONAMENTO, TRANSFERÊNCIA E MOBILIDADE

### NÍVEL DE AJUDA

|                                                                                                                                                                                                                                                                                                  |                   |                      |                |                         |              |                    |                            |                       |                       |                                                                                                                    |                            |
|--------------------------------------------------------------------------------------------------------------------------------------------------------------------------------------------------------------------------------------------------------------------------------------------------|-------------------|----------------------|----------------|-------------------------|--------------|--------------------|----------------------------|-----------------------|-----------------------|--------------------------------------------------------------------------------------------------------------------|----------------------------|
| <p>Considere como cada uma das atividades a seguir é <b>geralmente</b> realizada por/para seu filho(a). Avalie o <b>grau de dificuldade</b> de cada uma dessas atividades nas últimas 2 semanas e indique o <b>nível de ajuda</b> que foi necessária para ajudar seu filho(a) a realizá-las.</p> |                   |                      |                |                         |              |                    |                            | T<br>O<br>T<br>A<br>L | M<br>É<br>D<br>I<br>O | M<br>Í<br>N<br>I<br>M<br>O<br><br>O<br>U<br><br>S<br>U<br>P<br>E<br>R<br>V<br>I<br>S<br>I<br>O<br>N<br>A<br>D<br>O | N<br>E<br>N<br>H<br>U<br>M |
| <p><b>Nas últimas duas semanas, qual foi o grau de dificuldade nas seguintes situações:</b></p>                                                                                                                                                                                                  | <i>Impossível</i> | <i>Muito Difícil</i> | <i>Difícil</i> | <i>Um Pouco Difícil</i> | <i>Fácil</i> | <i>Muito Fácil</i> | <i>Sem Nenhum Problema</i> |                       |                       |                                                                                                                    |                            |
| 10. Deitar e levantar da cama?                                                                                                                                                                                                                                                                   | 0                 | 1                    | 2              | 3                       | 4            | 5                  | 6                          | 0                     | 1                     | 2                                                                                                                  | 3                          |
| 11. Transferir para ou de uma cadeira de rodas ou cadeira?                                                                                                                                                                                                                                       | 0                 | 1                    | 2              | 3                       | 4            | 5                  | 6                          | 0                     | 1                     | 2                                                                                                                  | 3                          |
| 12. Permanecer sentado(a) na cadeira de rodas ou cadeira?                                                                                                                                                                                                                                        | 0                 | 1                    | 2              | 3                       | 4            | 5                  | 6                          | 0                     | 1                     | 2                                                                                                                  | 3                          |
| 13. Manter-se em pé para se exercitar ou mudar de lugar?                                                                                                                                                                                                                                         | 0                 | 1                    | 2              | 3                       | 4            | 5                  | 6                          | 0                     | 1                     | 2                                                                                                                  | 3                          |

|                                                                        |   |   |   |   |   |   |   |   |   |   |   |
|------------------------------------------------------------------------|---|---|---|---|---|---|---|---|---|---|---|
| 14. Locomover-se pela casa? (do jeito que for possível).               | 0 | 1 | 2 | 3 | 4 | 5 | 6 | 0 | 1 | 2 | 3 |
| 15. Locomover-se fora de casa? (do jeito que for possível).            | 0 | 1 | 2 | 3 | 4 | 5 | 6 | 0 | 1 | 2 | 3 |
| 16. Entrar e sair de veículos? (carro, van ou ônibus).                 | 0 | 1 | 2 | 3 | 4 | 5 | 6 | 0 | 1 | 2 | 3 |
| 17. Ir a lugares públicos? (praças, cinema, teatros, excursões, etc.). | 0 | 1 | 2 | 3 | 4 | 5 | 6 | 0 | 1 | 2 | 3 |
| 2A. Outra atividade? Especifique:                                      | 0 | 1 | 2 | 3 | 4 | 5 | 6 | 0 | 1 | 2 | 3 |
| 2B. Outra atividade? Especifique:                                      | 0 | 1 | 2 | 3 | 4 | 5 | 6 | 0 | 1 | 2 | 3 |

### SEÇÃO 3: CONFORTO E EMOÇÕES

#### GRAU

| Nas últimas 2 semanas, considere se durante as atividades a seguir seu filho(a) teve dor ou desconforto. Avalie a <b>frequência</b> e o <b>grau</b> da dor ou desconforto. |                      |                             |                               |                      |                          |                    | I<br>N<br>T<br>E<br>N<br>S<br>O | M<br>É<br>D<br>I<br>O | L<br>E<br>V<br>E | N<br>E<br>N<br>H<br>U<br>M |
|----------------------------------------------------------------------------------------------------------------------------------------------------------------------------|----------------------|-----------------------------|-------------------------------|----------------------|--------------------------|--------------------|---------------------------------|-----------------------|------------------|----------------------------|
| Nas últimas duas semanas, com que frequência seu filho(a) teve dor ou desconforto:                                                                                         | <i>Todos os dias</i> | <i>Com muita frequência</i> | <i>Com frequência regular</i> | <i>Algumas vezes</i> | <i>Uma ou duas vezes</i> | <i>Nenhuma vez</i> |                                 |                       |                  |                            |
| 18. Ao comer ou beber ou ser alimentado?                                                                                                                                   | 0                    | 1                           | 2                             | 3                    | 4                        | 5                  | 0                               | 1                     | 2                | 3                          |
| 19. Durante o uso do banheiro? (urinar, defecar, limpar-se, trocar fraldas, etc.).                                                                                         | 0                    | 1                           | 2                             | 3                    | 4                        | 5                  | 0                               | 1                     | 2                | 3                          |
| 20. Enquanto colocava ou tirava roupas?                                                                                                                                    | 0                    | 1                           | 2                             | 3                    | 4                        | 5                  | 0                               | 1                     | 2                | 3                          |
| 21. Ao se transferir de um lugar para outro ou mudar de posição?                                                                                                           | 0                    | 1                           | 2                             | 3                    | 4                        | 5                  | 0                               | 1                     | 2                | 3                          |
| 22. Na posição sentada?                                                                                                                                                    | 0                    | 1                           | 2                             | 3                    | 4                        | 5                  | 0                               | 1                     | 2                | 3                          |

|                                                                         |                      |                             |                               |                      |                          |                    |                                 |                       |                       |                            |
|-------------------------------------------------------------------------|----------------------|-----------------------------|-------------------------------|----------------------|--------------------------|--------------------|---------------------------------|-----------------------|-----------------------|----------------------------|
| 23. Deitado(a) na cama?                                                 | 0                    | 1                           | 2                             | 3                    | 4                        | 5                  | 0                               | 1                     | 2                     | 3                          |
| 24. Que perturbou o sono de seu filho(a)?                               | 0                    | 1                           | 2                             | 3                    | 4                        | 5                  | 0                               | 1                     | 2                     | 3                          |
| 3A. Durante outra atividade?<br>Especifique:                            | 0                    | 1                           | 2                             | 3                    | 4                        | 5                  | 0                               | 1                     | 2                     | 3                          |
| 3B. Durante outra atividade?<br>Especifique:                            | 0                    | 1                           | 2                             | 3                    | 4                        | 5                  | 0                               | 1                     | 2                     | 3                          |
| Nas últimas <u>duas</u> semanas, com que frequência seu filho(a) ficou: | <i>Todos os dias</i> | <i>Com muita frequência</i> | <i>Com frequência regular</i> | <i>Algumas vezes</i> | <i>Uma ou duas vezes</i> | <i>Nenhuma vez</i> | GRAU                            |                       |                       |                            |
|                                                                         |                      |                             |                               |                      |                          |                    | I<br>N<br>T<br>E<br>N<br>S<br>O | M<br>É<br>D<br>I<br>O | L<br>E<br>V<br>E<br>U | N<br>E<br>N<br>H<br>U<br>M |
| 25. Agitado(a), aborrecido(a) ou bravo(a)?                              | 0                    | 1                           | 2                             | 3                    | 4                        | 5                  | 0                               | 1                     | 2                     | 3                          |
| 26. Infeliz ou triste?                                                  | 0                    | 1                           | 2                             | 3                    | 4                        | 5                  | 0                               | 1                     | 2                     | 3                          |

#### SEÇÃO 4: COMUNICAÇÃO E INTERAÇÃO SOCIAL

Considere como cada uma das atividades a seguir é **geralmente** realizada por/para seu filho(a). Classifique o **grau de dificuldade** de cada uma dessas atividades nas últimas 2 semanas.

|                                                                                             |                   |                      |                |                         |              |                    |                            |
|---------------------------------------------------------------------------------------------|-------------------|----------------------|----------------|-------------------------|--------------|--------------------|----------------------------|
| Nas últimas <u>duas</u> semanas, qual foi o grau de dificuldade que seu filho(a) teve para: | <i>Impossível</i> | <i>Muito Difícil</i> | <i>Difícil</i> | <i>Um Pouco Difícil</i> | <i>Fácil</i> | <i>Muito Fácil</i> | <i>Sem Nenhum Problema</i> |
| 27. Compreender você?                                                                       | 0                 | 1                    | 2              | 3                       | 4            | 5                  | 6                          |
| 28. Ser compreendido por você?                                                              | 0                 | 1                    | 2              | 3                       | 4            | 5                  | 6                          |
| 29. Na comunicação com pessoas que não conhecem bem seu filho(a)?                           | 0                 | 1                    | 2              | 3                       | 4            | 5                  | 6                          |

|                                                                                           |   |   |   |   |   |   |   |
|-------------------------------------------------------------------------------------------|---|---|---|---|---|---|---|
| 30. Brincar sozinho(a)?                                                                   | 0 | 1 | 2 | 3 | 4 | 5 | 6 |
| 31. Brincar com outras pessoas?                                                           | 0 | 1 | 2 | 3 | 4 | 5 | 6 |
| 32. Frequentar a escola, a creche ou a alfabetização?                                     | 0 | 1 | 2 | 3 | 4 | 5 | 6 |
| 33. Participar em atividades recreativas (nadar, interagir com a família e amigos, etc.)? | 0 | 1 | 2 | 3 | 4 | 5 | 6 |
| 4A. Outra atividade social?<br>Especifique:                                               | 0 | 1 | 2 | 3 | 4 | 5 | 6 |
| 4B. Outra atividade social?<br>Especifique:                                               | 0 | 1 | 2 | 3 | 4 | 5 | 6 |

### SEÇÃO 5: SAÚDE

| Nas últimas <u>duas semanas</u>                                      | Faça um círculo ao redor da resposta mais apropriada |                                          |                        |                   |                  |                    |
|----------------------------------------------------------------------|------------------------------------------------------|------------------------------------------|------------------------|-------------------|------------------|--------------------|
| 34. Quantas vezes seu filho(a) teve que ir ao médico ou ao hospital? | <i>Ficou internado por mais de 1 semana</i>          | <i>Ficou internado menos de 1 semana</i> | <i>3 ou mais vezes</i> | <i>Duas vezes</i> | <i>Uma vez</i>   | <i>Nenhuma vez</i> |
|                                                                      | 0                                                    | 1                                        | 2                      | 3                 | 4                | 5                  |
| 35. Como você classificaria a saúde geral de seu filho(a)?           | <i>Muito ruim</i>                                    | <i>Ruim</i>                              | <i>Regular</i>         | <i>Boa</i>        | <i>Muito boa</i> | <i>Excelente</i>   |
|                                                                      | 0                                                    | 1                                        | 2                      | 3                 | 4                | 5                  |

36. Liste os medicamentos tomados por seu filho(a) nas últimas 2 semanas:

0. Nenhum medicamento

1. ....
2. ....
3. ....
4. ....
5. ....
6. ....
7. ....
8. ....
9. ....

### SEÇÃO 6: QUALIDADE DE VIDA GERAL DE SEU FILHO(A)

| Nas <u>duas últimas semanas</u>                                               | <i>Muito ruim</i> | <i>Ruim</i> | <i>Regular</i> | <i>Boa</i> | <i>Muito boa</i> | <i>Excelente</i> |
|-------------------------------------------------------------------------------|-------------------|-------------|----------------|------------|------------------|------------------|
| <b>37. Como você classificaria a qualidade de vida geral de seu filho(a)?</b> | <b>0</b>          | <b>1</b>    | <b>2</b>       | <b>3</b>   | <b>4</b>         | <b>5</b>         |

### SEÇÃO 7: IMPORTÂNCIA DOS ITENS PARA A QUALIDADE DE VIDA DE SEU FILHO(A)

| No atual estado de seu filho(a), qual é a importância desses itens na qualidade de vida dele(a)? | <i>O menos importante</i> | <i>Não muito importante</i> | <i>Um pouco importante</i> | <i>Mais ou menos importante</i> | <i>Importante</i> | <i>O mais importante</i> |
|--------------------------------------------------------------------------------------------------|---------------------------|-----------------------------|----------------------------|---------------------------------|-------------------|--------------------------|
| <b>1. Comer ou beber ou ser alimentado</b>                                                       | <b>0</b>                  | <b>1</b>                    | <b>2</b>                   | <b>3</b>                        | <b>4</b>          | <b>5</b>                 |
| <b>2. Manter a higiene bucal</b>                                                                 | <b>0</b>                  | <b>1</b>                    | <b>2</b>                   | <b>3</b>                        | <b>4</b>          | <b>5</b>                 |
| <b>3. Tomar banho ou lavar-se</b>                                                                | <b>0</b>                  | <b>1</b>                    | <b>2</b>                   | <b>3</b>                        | <b>4</b>          | <b>5</b>                 |
| <b>4. Usar o banheiro ou fazer a higiene</b>                                                     | <b>0</b>                  | <b>1</b>                    | <b>2</b>                   | <b>3</b>                        | <b>4</b>          | <b>5</b>                 |
| <b>5. Trocar fraldas ou roupa de baixo</b>                                                       | <b>0</b>                  | <b>1</b>                    | <b>2</b>                   | <b>3</b>                        | <b>4</b>          | <b>5</b>                 |
| <b>6. Colocar ou tirar roupas da parte de cima do corpo</b>                                      | <b>0</b>                  | <b>1</b>                    | <b>2</b>                   | <b>3</b>                        | <b>4</b>          | <b>5</b>                 |
| <b>7. Colocar ou tirar roupas da parte de baixo do corpo</b>                                     | <b>0</b>                  | <b>1</b>                    | <b>2</b>                   | <b>3</b>                        | <b>4</b>          | <b>5</b>                 |
| <b>8. Colocar ou usar calçados</b>                                                               | <b>0</b>                  | <b>1</b>                    | <b>2</b>                   | <b>3</b>                        | <b>4</b>          | <b>5</b>                 |
| <b>9. Cuidar dos cabelos ou se arrumar</b>                                                       | <b>0</b>                  | <b>1</b>                    | <b>2</b>                   | <b>3</b>                        | <b>4</b>          | <b>5</b>                 |
| <b>10. Deitar-se e levantar-se da cama</b>                                                       | <b>0</b>                  | <b>1</b>                    | <b>2</b>                   | <b>3</b>                        | <b>4</b>          | <b>5</b>                 |
| <b>11. Transferir-se para a cadeira de rodas ou cadeira ou sair dela</b>                         | <b>0</b>                  | <b>1</b>                    | <b>2</b>                   | <b>3</b>                        | <b>4</b>          | <b>5</b>                 |
| <b>12. Permanecer sentado(a) na cadeira de rodas ou cadeira</b>                                  | <b>0</b>                  | <b>1</b>                    | <b>2</b>                   | <b>3</b>                        | <b>4</b>          | <b>5</b>                 |
| <b>13. Ficar em pé para se exercitar ou mudar de lugar</b>                                       | <b>0</b>                  | <b>1</b>                    | <b>2</b>                   | <b>3</b>                        | <b>4</b>          | <b>5</b>                 |
| <b>14. Locomover-se em ambientes fechados</b>                                                    | <b>0</b>                  | <b>1</b>                    | <b>2</b>                   | <b>3</b>                        | <b>4</b>          | <b>5</b>                 |
| <b>15. Locomover-se em ambientes externos</b>                                                    | <b>0</b>                  | <b>1</b>                    | <b>2</b>                   | <b>3</b>                        | <b>4</b>          | <b>5</b>                 |

|                                                                          |   |   |   |   |   |   |
|--------------------------------------------------------------------------|---|---|---|---|---|---|
| 16. Entrar e sair de veículos                                            | 0 | 1 | 2 | 3 | 4 | 5 |
| 17. Visitar lugares públicos                                             | 0 | 1 | 2 | 3 | 4 | 5 |
| 18. Conforto durante a alimentação                                       | 0 | 1 | 2 | 3 | 4 | 5 |
| 19. Conforto ao usar o banheiro                                          | 0 | 1 | 2 | 3 | 4 | 5 |
| 20. Conforto ao colocar ou tirar roupas                                  | 0 | 1 | 2 | 3 | 4 | 5 |
| 21. Conforto ao se transferir de um lugar para outro ou mudar de posição | 0 | 1 | 2 | 3 | 4 | 5 |
| 22. Conforto enquanto está sentado(a)                                    | 0 | 1 | 2 | 3 | 4 | 5 |
| 23. Conforto enquanto está deitado(a)                                    | 0 | 1 | 2 | 3 | 4 | 5 |
| 24. Conforto enquanto dorme                                              | 0 | 1 | 2 | 3 | 4 | 5 |
| 25. Estado emocional ou comportamento                                    | 0 | 1 | 2 | 3 | 4 | 5 |
| 26. Felicidade                                                           | 0 | 1 | 2 | 3 | 4 | 5 |
| 27. Capacidade de compreender você                                       | 0 | 1 | 2 | 3 | 4 | 5 |
| 28. Capacidade de ser compreendido(a) por você                           | 0 | 1 | 2 | 3 | 4 | 5 |
| 29. Capacidade de comunicar-se com outras pessoas                        | 0 | 1 | 2 | 3 | 4 | 5 |
| 30. Capacidade de brincar sozinho(a)                                     | 0 | 1 | 2 | 3 | 4 | 5 |
| 31. Capacidade de brincar com outras pessoas                             | 0 | 1 | 2 | 3 | 4 | 5 |
| 32. Capacidade de frequentar a escola, a creche ou a alfabetização       | 0 | 1 | 2 | 3 | 4 | 5 |
| 33. Capacidade de participar de atividades recreativas                   | 0 | 1 | 2 | 3 | 4 | 5 |
| 34. Minimizar idas ao médico e hospitalização                            | 0 | 1 | 2 | 3 | 4 | 5 |
| 35. Saúde em geral                                                       | 0 | 1 | 2 | 3 | 4 | 5 |
| 36. Minimizar o número de medicamentos                                   | 0 | 1 | 2 | 3 | 4 | 5 |



## SEÇÃO 8: INFORMAÇÕES SOBRE SEU FILHO(A)

|                                                                                                                                  |                                              |                                                 |
|----------------------------------------------------------------------------------------------------------------------------------|----------------------------------------------|-------------------------------------------------|
| 1. Sexo da criança:                                                                                                              | <input type="checkbox"/> Masculino           | <input type="checkbox"/> Feminino               |
| 2. Qual é a data de nascimento de seu filho(a)?                                                                                  | ____ / ____ / _____<br>Dia      Mês      Ano |                                                 |
| 3. Qual o maior nível escolar completado por seu filho(a)? (marque apenas um)                                                    |                                              |                                                 |
| <input type="checkbox"/> Pré-escola                                                                                              | <input type="checkbox"/> 5º Ano              | <input type="checkbox"/> 9º Ano                 |
| <input type="checkbox"/> 1º Ano                                                                                                  | <input type="checkbox"/> 6º Ano              | <input type="checkbox"/> 1ª Série do Ens. Médio |
| <input type="checkbox"/> 2º Ano                                                                                                  | <input type="checkbox"/> 7º Ano              | <input type="checkbox"/> 2ª Série do Ens. Médio |
| <input type="checkbox"/> 3º Ano                                                                                                  | <input type="checkbox"/> 8º Ano              | <input type="checkbox"/> 3ª Série do Ens. Médio |
| <input type="checkbox"/> 4º Ano                                                                                                  |                                              |                                                 |
| Frequenta(ou) ensino não seriado? <input type="checkbox"/> Sim <input type="checkbox"/> Não. Se sim, há(por) quanto tempo? _____ |                                              |                                                 |

## SEÇÃO 9: INFORMAÇÕES SOBRE VOCÊ

|                                                                                                                  |                                                                    |                                                                  |
|------------------------------------------------------------------------------------------------------------------|--------------------------------------------------------------------|------------------------------------------------------------------|
| 1. Sexo:                                                                                                         | <input type="checkbox"/> Masculino                                 | <input type="checkbox"/> Feminino                                |
| 2. Qual é a sua data de nascimento?                                                                              | ____ / ____ / _____<br>Dia      Mês      Ano                       |                                                                  |
| 3. Qual a melhor descrição de sua situação em relação a trabalho? (marque todas as alternativas que se apliquem) |                                                                    |                                                                  |
| <input type="checkbox"/> Não trabalho atualmente devido à condição de saúde de meu filho(a).                     | <input type="checkbox"/> Não estou trabalhando por outros motivos. | <input type="checkbox"/> Estou procurando trabalho fora de casa. |
| <input type="checkbox"/> Trabalho em tempo integral ou meio período, em casa ou fora                             | <input type="checkbox"/> Sou dona-de-casa em período integral      |                                                                  |
| 4. Qual a melhor descrição de sua relação com a criança?                                                         |                                                                    |                                                                  |
| <input type="checkbox"/> Pai/mãe biológico (a)                                                                   | <input type="checkbox"/> Padrasto/madrasta                         | <input type="checkbox"/> Pai/mãe de criação                      |
| <input type="checkbox"/> Pai/mãe adotivo (a)                                                                     | <input type="checkbox"/> Tutor                                     | <input type="checkbox"/> Cuidador Profissional                   |
| <input type="checkbox"/> Outro (Por favor explique):                                                             | .....                                                              |                                                                  |

5. Em média, quantos dias por semana você é responsável por cuidar de sua criança? \_\_\_\_\_ dias por semana

6. Qual é o seu grau de escolaridade?

- |                                     |                                                 |                                                                |
|-------------------------------------|-------------------------------------------------|----------------------------------------------------------------|
| <input type="checkbox"/> Pré-escola | <input type="checkbox"/> 6º Ano                 | <input type="checkbox"/> 3ª Série do Ens. Médio                |
| <input type="checkbox"/> 1º Ano     | <input type="checkbox"/> 7º Ano                 | <input type="checkbox"/> Ensino Técnico                        |
| <input type="checkbox"/> 2º Ano     | <input type="checkbox"/> 8º Ano                 | <input type="checkbox"/> Ensino Superior                       |
| <input type="checkbox"/> 3º Ano     | <input type="checkbox"/> 9º Ano                 | <input type="checkbox"/> Pós-graduação<br><i>Lato Sensu</i>    |
| <input type="checkbox"/> 4º Ano     | <input type="checkbox"/> 1ª Série do Ens. Médio | <input type="checkbox"/> Pós-graduação<br><i>Stricto Sensu</i> |
| <input type="checkbox"/> 5º Ano     | <input type="checkbox"/> 2ª Série do Ens. Médio |                                                                |

Frequenta(ou) ensino não seriado? ( ) Sim ( ) Não. Se sim, há(por) quanto tempo? \_\_\_\_\_

Quanto tempo você levou para responder somente a este questionário (em minutos):\_\_\_\_\_.

**OBRIGADO POR SUA PARTICIPAÇÃO!**
